# Supplementary material for: Quantification of SLIT-ROBO transcripts in hepatocellular carcinoma reveals two groups of genes with coordinate expression
Source: PubMed Central journal article supplement (PMC2632672; doi:10.1186/1471-2407-8-392), 2008-12-29
Supplement: 1471-2407-8-392-S1.pdf [file 1471-2407-8-392-S1.pdf]

**Additional file 1.** Clinicopathological characteristics of normal liver and HCC samples

| <b>Sample #</b> | <b>Appearance</b> | <b>Diagnosis/Histology</b>          | <b>Differentiation</b> | <b>Stage</b> |
|-----------------|-------------------|-------------------------------------|------------------------|--------------|
| N1              | Normal            | hcc                                 | tumor-adjacent normal  | 0            |
| N2              | Normal            | hcc/adenocarcinoma                  | tumor-adjacent normal  | 0            |
| N3              | Normal            | hcc                                 | tumor-adjacent normal  | 0            |
| N4              | Normal            | hcc                                 | tumor-adjacent normal  | 0            |
| N5              | Normal            | granuloma                           | tumor-adjacent normal  | 0            |
| N6              | Normal            | nodular hyperplasia of liver, focal | tumor-adjacent normal  | 0            |
| N7              | Normal            | hcc                                 | tumor-adjacent normal  | 0            |
| N8              | Normal            | hcc                                 | tumor-adjacent normal  | 0            |
| T1              | Tumor             | hcc                                 | well                   | 1            |
| T2              | Tumor             | hcc                                 | moderate               | 1            |
| T3              | Tumor             | hcc                                 | well                   | 1            |
| T4              | Tumor             | hcc                                 | N/A                    | 1            |
| T5              | Tumor             | hcc                                 | poor                   | 1            |
| T6              | Tumor             | hcc                                 | N/A                    | 1            |
| T7              | Tumor             | hcc                                 | moderate               | 1            |
| T8              | Tumor             | hcc                                 | moderate               | 1            |
| T9              | Tumor             | hcc                                 | N/A                    | 1            |
| T10             | Tumor             | hcc                                 | moderate               | 2            |
| T11             | Tumor             | hcc/adenocarcinoma                  | moderate               | 2            |
| T12             | Tumor             | hcc/invasive                        | N/A                    | 2            |
| T13             | Tumor             | hcc/adenocarcinoma                  | poor                   | 2            |
| T14             | Tumor             | hcc                                 | well                   | 2            |
| T15             | Tumor             | hcc                                 | moderate               | 2            |
| T16             | Tumor             | hcc                                 | well                   | 2            |
| T17             | Tumor             | hcc                                 | moderate               | 2            |
| T18             | Tumor             | hcc/adenocarcinoma                  | poor                   | 2            |
| T19             | Tumor             | hcc                                 | well                   | 2            |
| T20             | Tumor             | hcc/invasive                        | N/A                    | 2            |
| T21             | Tumor             | hcc                                 | well                   | 3a           |
| T22             | Tumor             | hcc                                 | poor                   | 3a           |
| T23             | Tumor             | hcc                                 | moderate               | 3a           |
| T24             | Tumor             | hcc                                 | moderate               | 3a           |
| T25             | Tumor             | hcc                                 | moderate               | 3a           |
| T26             | Tumor             | hcc                                 | well                   | 3a           |
| T27             | Tumor             | hcc                                 | moderate               | 3a           |
| T28             | Tumor             | hcc                                 | moderate               | 3a           |
| T29             | Tumor             | hcc                                 | well                   | 3a           |
| T30             | Tumor             | hcc                                 | poor                   | 3a           |
| T31             | Tumor             | hcc                                 | moderate               | 3a           |
| T32             | Tumor             | hcc                                 | moderate               | 3a           |
| T33             | Tumor             | hcc                                 | moderate               | 3a           |
| T34             | Tumor             | hcc                                 | moderate               | 4            |
| T35             | Tumor             | hcc/from omentum                    | poor                   | 4            |
