# Supplementary material for: Quantification of SLIT-ROBO transcripts in hepatocellular carcinoma reveals two groups of genes with coordinate expression
Source: PubMed Central journal article supplement (PMC2632672; doi:10.1186/1471-2407-8-392), 2008-12-29
Supplement: 1471-2407-8-392-S3.pdf [file 1471-2407-8-392-S3.pdf]

**Additional file 3.** Relative expression of *SLIT-ROBO* and *AFP* genes in HCC cell lines

|          | <i>ROBO1</i> | <i>ROBO2</i> | <i>ROBO4</i> | <i>SLIT1</i> | <i>SLIT2</i> | <i>SLIT3</i> | <i>AFP</i> |
|----------|--------------|--------------|--------------|--------------|--------------|--------------|------------|
| Focus    | -1.53        | -4.95        | 3.32         | -1.72        | 1.85         | -0.22        | -4.86      |
| Hep40    | 2.05         | 4.88         | 1.67         | 3.23         | 2.08         | 3.83         | 2.19       |
| Hep3B    | 2.62         | 2.66         | -0.78        | 1.10         | 2.88         | -6.32        | 2.78       |
| Hep3B-TR | 2.67         | 4.46         | 0.40         | 0.23         | 4.95         | -7.35        | 8.94       |
| HepG2    | 2.52         | -3.65        | -2.27        | 1.35         | -4.22        | -4.77        | 11.03      |
| Huh7     | 1.55         | 7.44         | -1.62        | 4.60         | 4.25         | -5.00        | 11.19      |
| Mahlavu  | -0.93        | -3.61        | -0.87        | -3.30        | 2.33         | 3.90         | -5.07      |
| PLC      | 2.80         | 2.85         | -0.89        | -1.75        | -3.95        | -5.82        | 1.09       |
| SKHep1   | 0.45         | -1.99        | 3.58         | -1.87        | 3.68         | 6.93         | -3.14      |
| Snu387   | -5.58        | -2.83        | 1.56         | 0.23         | 2.15         | 0.03         | -3.86      |
| Snu398   | 0.35         | 5.54         | -2.18        | 6.28         | -6.65        | -4.67        | -4.87      |
| Snu423   | -1.03        | -3.56        | -0.79        | -2.05        | -5.25        | 7.65         | -9.94      |
| Snu449   | -4.38        | -3.65        | -0.23        | -3.57        | -4.40        | 6.63         | -5.43      |
| Snu475   | -1.23        | -3.93        | -0.88        | -1.37        | -0.10        | 6.03         | -0.04      |
