# Supplementary material for: Quantification of SLIT-ROBO transcripts in hepatocellular carcinoma reveals two groups of genes with coordinate expression
Source: PubMed Central journal article supplement (PMC2632672; doi:10.1186/1471-2407-8-392), 2008-12-29
Supplement: 1471-2407-8-392-S4.pdf [file 1471-2407-8-392-S4.pdf]

**Additional file 4.** Relative expression of *SLIT-ROBO* and *AFP* genes in normal liver and HCC samples.

| <b>Sample #</b> | <b>ROBO1</b> | <b>ROBO2</b> | <b>ROBO4</b> | <b>SLIT1</b> | <b>SLIT2</b> | <b>SLIT3</b> | <b>AFP</b> |
|-----------------|--------------|--------------|--------------|--------------|--------------|--------------|------------|
| <b>N1</b>       | -0.66        | -2.49        | 0.15         | 2.76         | 0.03         | 1.09         | 2.06       |
| <b>N2</b>       | 0.24         | 1.61         | 0.35         | -1.04        | 1.63         | 1.09         | 1.98       |
| <b>N3</b>       | 0.04         | -2.39        | 1.35         | -0.94        | 0.43         | -0.21        | 1.23       |
| <b>N4</b>       | -0.66        | -2.49        | -0.75        | -1.04        | -1.88        | 0.09         | -0.74      |
| <b>N5</b>       | -0.06        | 1.81         | -0.55        | 1.76         | -0.78        | -1.21        | -0.96      |
| <b>N6</b>       | 1.34         | 3.71         | 1.05         | -0.14        | 0.83         | -0.21        | -1.45      |
| <b>N7</b>       | -0.06        | -0.69        | -1.85        | -0.84        | -1.18        | -2.41        | -1.30      |
| <b>N8</b>       | -0.16        | 0.91         | 0.25         | -0.54        | 0.93         | 1.79         | -0.83      |
| <b>T1</b>       | 1.84         | -0.79        | -1.75        | 0.66         | -2.68        | -3.81        | 5.46       |
| <b>T2</b>       | 1.74         | 1.71         | -0.65        | -0.34        | -1.48        | -0.71        | -2.24      |
| <b>T3</b>       | 0.74         | -0.69        | -1.05        | 0.76         | -0.58        | 0.39         | 0.13       |
| <b>T4</b>       | 0.14         | -1.59        | -1.05        | -0.14        | -2.68        | -2.41        | 0.08       |
| <b>T5</b>       | 2.04         | 0.51         | -3.15        | -0.34        | 0.83         | -1.11        | 5.48       |
| <b>T6</b>       | 1.44         | -0.99        | 0.25         | 0.46         | 2.63         | 1.89         | 0.00       |
| <b>T7</b>       | -0.16        | -1.49        | -0.15        | 0.86         | 0.33         | -0.11        | -1.01      |
| <b>T8</b>       | -0.16        | -1.49        | 0.15         | 4.56         | -0.38        | -2.81        | -1.77      |
| <b>T9</b>       | -0.46        | -1.39        | 0.15         | 0.06         | 0.43         | -0.71        | -0.99      |
| <b>T10</b>      | 3.84         | 0.91         | -0.25        | -1.04        | 0.73         | 1.59         | 8.68       |
| <b>T11</b>      | 3.44         | -2.09        | -0.35        | -0.64        | -4.98        | -0.91        | 4.75       |
| <b>T12</b>      | 4.24         | -2.69        | -1.95        | 1.76         | -7.68        | -0.71        | -0.09      |
| <b>T13</b>      | 1.54         | 1.01         | -2.75        | 3.56         | -1.68        | -0.51        | 6.72       |
| <b>T14</b>      | 1.64         | 2.41         | -0.35        | -0.54        | 0.63         | 1.59         | -0.07      |
| <b>T15</b>      | 3.04         | 1.61         | -3.25        | 2.76         | -5.38        | -4.11        | 11.63      |
| <b>T16</b>      | 3.14         | -0.99        | 0.35         | 0.46         | -1.28        | -0.01        | 5.09       |
| <b>T17</b>      | 2.94         | -0.99        | -1.25        | 0.46         | -7.88        | -2.81        | -6.19      |
| <b>T18</b>      | 0.84         | -2.89        | 0.45         | -1.44        | 3.93         | 2.49         | -1.81      |
| <b>T19</b>      | 1.54         | -1.59        | 0.65         | -0.14        | 1.03         | 1.59         | 3.13       |
| <b>T20</b>      | -0.06        | 2.61         | -0.95        | 0.06         | -2.68        | -3.01        | 0.87       |
| <b>T21</b>      | 1.14         | -0.29        | -1.95        | 1.16         | -0.98        | -1.91        | 4.09       |
| <b>T22</b>      | 4.34         | -1.89        | -0.35        | -0.44        | 2.83         | 1.79         | -0.73      |
| <b>T23</b>      | 1.44         | -0.79        | -1.05        | 5.96         | 1.03         | 2.59         | -6.07      |
| <b>T24</b>      | -1.06        | 2.41         | -1.05        | -0.34        | 1.13         | 5.09         | -9.53      |
| <b>T25</b>      | 4.54         | 1.41         | -1.55        | -0.24        | -6.38        | -3.11        | -4.18      |
| <b>T26</b>      | -1.16        | -3.49        | 1.15         | -2.04        | -1.28        | -2.71        | -10.13     |
| <b>T27</b>      | 3.64         | 0.71         | 0.25         | -1.24        | -0.78        | 0.69         | -3.99      |
| <b>T28</b>      | 3.94         | 6.11         | -1.95        | -0.14        | 0.23         | 0.49         | 11.36      |
| <b>T29</b>      | -0.46        | -0.99        | -1.85        | 0.46         | 0.13         | 0.59         | -0.17      |
| <b>T30</b>      | 0.04         | -0.99        | -4.85        | 2.46         | 1.13         | 1.59         | 1.95       |
| <b>T31</b>      | -0.26        | 1.11         | -0.45        | -0.44        | -1.08        | -0.31        | 2.41       |
| <b>T32</b>      | 1.44         | -2.19        | 0.25         | -0.74        | 0.63         | 1.29         | 1.94       |
| <b>T33</b>      | 1.04         | -1.29        | 0.95         | 0.16         | 1.43         | 2.29         | -2.67      |
| <b>T34</b>      | 0.94         | -2.19        | -0.25        | -0.74        | 2.33         | 0.39         | -5.27      |
| <b>T35</b>      | 2.24         | -1.99        | -1.45        | -0.54        | -0.98        | 0.39         | 9.94       |
